# Supplementary material for: Evidence of Artemisinin-Resistant Malaria in Western Cambodia
Source: Atypon-hosted journal article supplement (doi:10.1056/nejmc0805011), 2008-12-08
Supplement: nejm_noedl_2619sa1.pdf [file nejm_noedl_2619sa1.pdf]

## Supplementary Appendix

This appendix has been provided by the authors to give readers additional information about their work.

Supplement to: Noedl H, Se Y, Schaecher K, Smith BL, Socheat D, Fukuda MM. Evidence of artemisinin-resistant malaria in western Cambodia. *N Engl J Med* 2008;359:2619-20. DOI: 10.1056/NEJMc0805011.

Web-only Table. Day 0 DHA Concentrations, Intrinsic Drug Sensitivity, and Treatment Response Parameters for the 4 Patients who Failed Artesunate Monotherapy

|               | DHA Conc. (nM) |       | IC <sub>50</sub> (nM) |                  | Pfmdr1<br>copy no | Treatment<br>response (hrs) |                 |
|---------------|----------------|-------|-----------------------|------------------|-------------------|-----------------------------|-----------------|
|               | 1.5 h          | 2.5 h | DHA                   | MQ               | Pfmdr1            | PCT                         | FCT             |
| Overall       | 4,268          | 2953  | 3.34                  | 16.55            | 1.1               | 57.6                        | 10.0            |
|               | ±2,418         | ±1989 | (2.2 –<br>4.5)        | (12.3 –<br>22.2) | (0.5 –<br>4.0)    | (37.9 –<br>82.0)            | (0.0 –<br>33.2) |
| Failed Case 1 | 3988           | 1639  | 14.42                 | 10.43            | 1                 | 133.25                      | 24.25           |
| Failed Case 2 | 4001           | 1996  | 14.00                 | 80.33            | 1                 | 95.17                       | 28.17           |
| Failed Case 3 | 1257           | 210   | 4.64                  | 6.38             | 1                 | 76.33                       | 0.00            |
| Failed Case 4 | 335            | 685   | 4.08                  | 11.12            | 1                 | 100.03                      | 29.03           |

DHA concentrations ( $\pm$  standard deviation, n = 70); IC<sub>50</sub> = 50% inhibitory concentrations (geometric mean with 95% confidence intervals); DHA = dihydroartemisinin; MQ = mefloquine; PCT = parasite clearance time (median with interquartile range; artesunate arm only); FCT = fever clearance time (median with interquartile range; artesunate arm only)
